# Supplementary material for: The conserved helicase ZNFX-1 memorializes silenced RNAs in perinuclear condensates
Source: PubMed Central journal article supplement (PMC9276528; doi:10.1038/s41556-022-00940-w), 2022-06-23

**S8A**

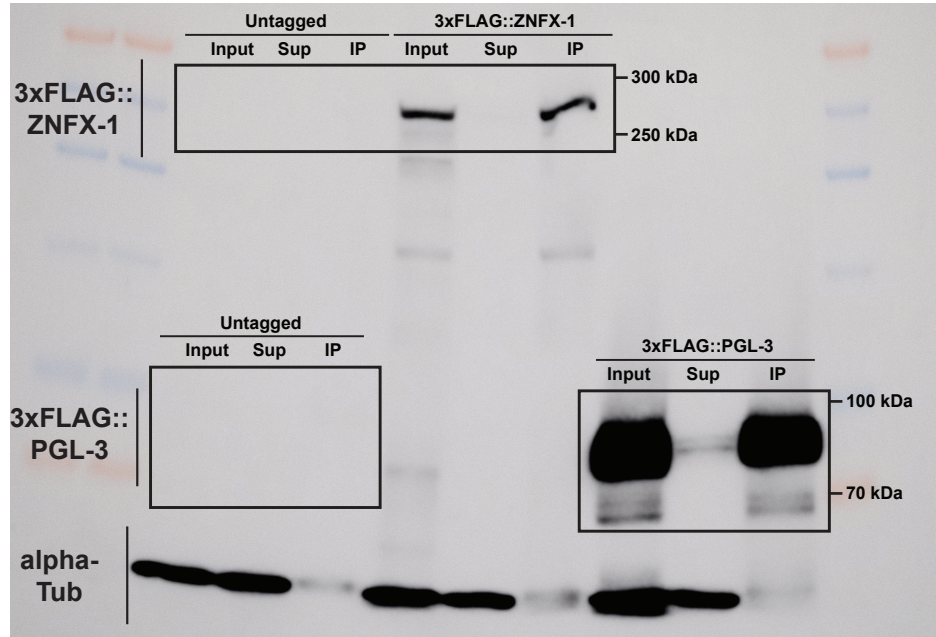

**S8B**

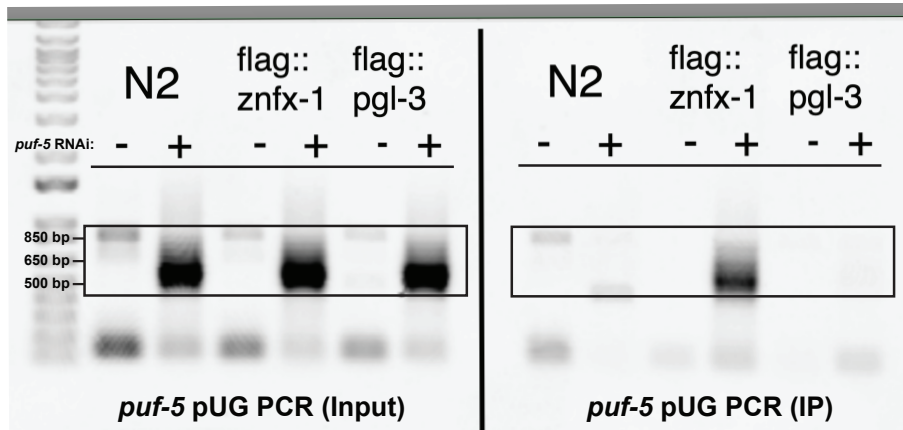

Supplement: 41556_2022_940_MOESM16_ESM.pdf [file 41556_2022_940_MOESM16_ESM.pdf]
